1 **Triggering visually-guided behavior by holographic activation of**  
2 **pattern completion neurons in cortical ensembles**

3

4 Luis Carrillo-Reid, Shuting Han, Weijian Yang, Alejandro Akrouh and Rafael  
5 Yuste.

6

7 NeuroTechnology Center, Department of Biological Sciences, Columbia  
8 University, New York, NY, 10027. U.S.A.

9

10

11

12 **Corresponding author e-mail:**

13 [rmy5@columbia.edu](mailto:rmy5@columbia.edu)

14

15 **Abstract**

16 Neuronal ensembles are building blocks of cortical activity yet it is unclear if they  
17 have any causal role in behavior. Here we tested if the precise activation of  
18 neuronal ensembles with two-photon holographic optogenetics in mouse primary  
19 visual cortex alters behavioral performance in a visual task. Disruption of  
20 behaviorally relevant cortical ensembles by activation of non-selective neurons  
21 decreased behavioral performance whereas optogenetic targeting of as few as  
22 two neurons with pattern completion capability from behaviorally relevant  
23 ensembles improved task performance by reliably recalling the whole ensemble.  
24 Moreover, in some cases, activation of two pattern completion neurons, in the  
25 absence of visual stimulus, triggered correct behavioral responses. Our results  
26 demonstrate a causal role of neuronal ensembles in a visually guided behavior  
27 and suggest that ensembles could represent perceptual states.

28

29 **Introduction**

30 Cortical circuits generate synchronous activity states, also known as neuronal  
31 ensembles (or assemblies), that may constitute emergent functional units, as  
32 building blocks of memories, percepts, movements, or mental states (Abeles,  
33 1991; Buzsaki, 2010; Churchland et al., 2012; Hopfield, 1982; Villette et al.,  
34 2015; Yuste, 2015). In mouse visual cortex, visual stimuli activate groups of  
35 neurons with coordinated activity defining neuronal ensembles (Carrillo-Reid et  
36 al., 2015b; Cossart et al., 2003a; Miller et al., 2014). These ensembles are also  
37 present in spontaneous activity, indicating that they can be stored and replayed  
38 by cortical circuits (Carrillo-Reid et al., 2016; MacLean et al., 2005; Miller et al.,  
39 2014). Moreover, using two-photon optogenetics, artificial ensembles can be  
40 stably imprinted in awake animals and later recalled by stimulating individual  
41 neurons, demonstrating that cortical circuits have pattern completion capability  
42 (Carrillo-Reid et al., 2016). However, the functional role of recalled cortical  
43 ensembles in behavior, if any, still remains unclear.

44 To explore this, we combined calcium imaging of neuronal populations (Yuste  
45 and Katz, 1991), two-photon microscopy (Denk et al., 1990; Yuste and Denk,

46 1995) and population analysis (Carrillo-Reid et al., 2017; Carrillo-Reid et al.,  
47 2015a) to identify neuronal ensembles in primary visual cortex from awake mice  
48 performing a visually guided Go/No-Go behavioral task. Then, using two-photon  
49 holographic optogenetics (Nikolenko et al., 2008; Packer et al., 2015; Rickgauer  
50 et al., 2014; Yang et al., 2018), we activated specific groups of neurons  
51 overlapped with visual stimuli to disrupt or recall cortical ensembles, while  
52 measuring the effect on behavioral performance. The use of a simple Go/No-Go  
53 task allowed us to precisely study changes in behavioral performance evoked by  
54 photostimulation at different contrast levels of visual stimuli. We take advantage  
55 of the existence of pattern completion neurons to manipulate neuronal  
56 ensembles optogenetically. We show that optogenetic activation of random group  
57 of cells during normal contrast visual stimuli disrupted cortical ensembles and  
58 deteriorated behavior whereas specific activation of neurons with pattern  
59 completion capability reliably recalled behaviorally relevant ensembles and  
60 improved task performance with low contrast visual stimuli. Moreover,  
61 optogenetic targeting of behaviorally relevant pattern completion neurons could  
62 even triggered behavior in the absence of visual stimulus.

63

## 64 **Results**

### 65 **Head-fixed mice reliably perform visual Go/No-Go task**

66 We carried out simultaneous two-photon imaging (GCaMP6s) and two-photon  
67 holographic optogenetics (C1V1) of targeted neurons in layer 2/3 of primary  
68 visual cortex (Packer et al., 2015; Rickgauer et al., 2014; Yang et al., 2018)  
69 through a reinforced thinned-skull window (Drew et al., 2010) in awake head-  
70 fixed mice that have been trained in a Go/No-Go visually guided task consisting  
71 of orthogonal drifting-gratings (Figs. 1A and 1B). Mice underwent a regime of  
72 habituation to the treadmill and water restriction for 2 days until they reached  
73 85% of their original weight. After this habituation period, mice went through 3  
74 days of continuous reinforcement where water reward was delivered following  
75 the Go signal (at 100% visual contrast). After this continuous reinforcement  
76 period, and to avoid sudden changes in pupil diameter due to high contrast visual

77 stimuli, we reduced the contrast level to 50%. During this training protocol mice  
78 gradually learned to lick correctly when Go and No-Go visual stimuli were  
79 randomly presented. After 7 days of performing the visually-guided behavioral  
80 task (at 50% contrast) mice reached a performance level above 75% that plateau  
81 for at least 8 days. We considered expert mice those with a behavioral  
82 performance above 75% from day 10 on (Fig. 1C; Performance = hits/(hits+miss)  
83 – false choices/(false choices+correct rejects). Improvement in behavioral  
84 performance (Fig. 1D; day 1: 31±5%; expert: 97±1%; P<0.005\*\*) due to  
85 increased hits (day 1: 83±7%; expert: 99±1%; P<0.005\*\*) and reduced false  
86 choices (day 1: 52±8%; expert: 3±1%; P<0.005\*\*) was accompanied by a faster  
87 licking onset (Fig. 1E; day 1: 1711±84s; expert: 988±146s; P<0.005\*\*). Low  
88 contrast levels of visual stimuli (10% - 40%) generated a reduction of behavioral  
89 performance (Fig. 1F; normal contrast: 82±4%; low contrast: 54±4%; P<0.005\*\*).  
90 These experiments demonstrated that head-fixed mice can perform consistently  
91 a visually guided Go/No-Go task.

92

Carrillo-Reid\_Yuste Fig. 1

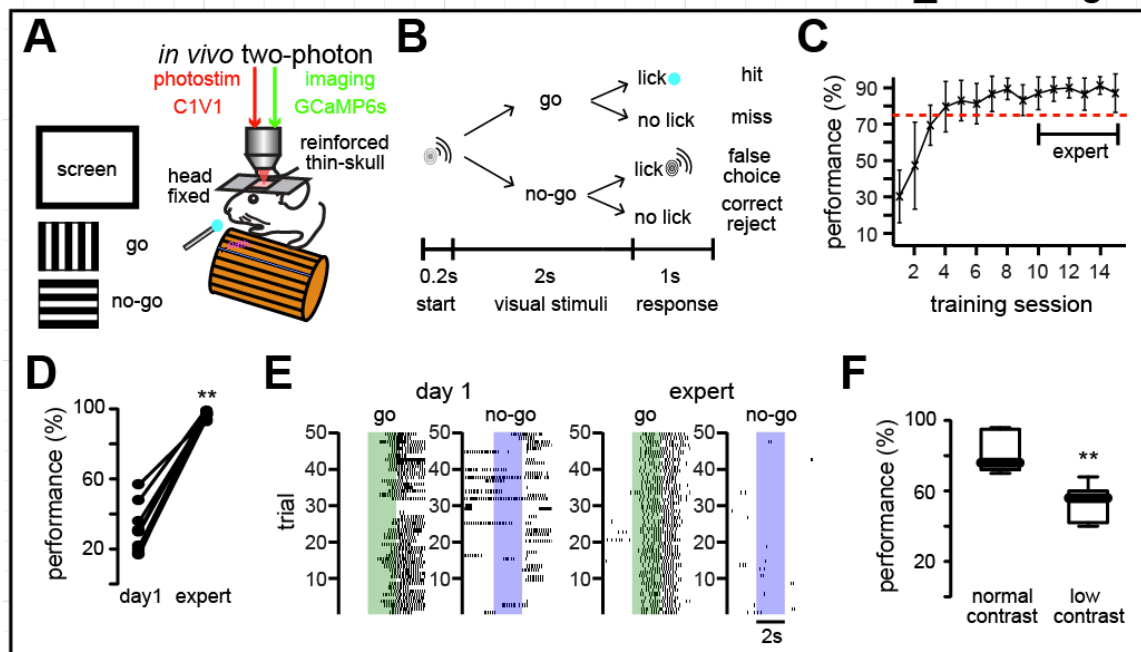

93

94 **Fig. 1. Visually-guided Go/No-Go task.**

95 (A) Experimental design: simultaneous two-photon calcium imaging and two-photon optogenetic  
96 manipulation of targeted neurons in visually guided Go/No-Go task. (B) Performance

97 assessment. (C) Improvement in performance as a function of training session. (D) Performance  
98 increased significantly in expert mice ( $P < 0.005^{**}$ ;  $n = 9$  mice; Wilcoxon matched-pairs signed  
99 rank test). (E) Enhancement of behavioral performance was reflected as shorter licking delays.  
100 Colored bars represent visual stimuli (Go: green; No-Go: blue; expert: day 10). Dark markers  
101 correspond to lick. (F) Worsening in performance by low contrast visual stimuli in expert animals  
102 ( $P < 0.005^{**}$ ;  $n = 7$  mice. Data presented as whisker box plots displaying median and interquartile  
103 ranges analyzed using Mann-Whitney test).

104

## 105 **Identification of neuronal ensembles and pattern completion neurons**

106 We followed previous studies, which have shown activation of neuronal  
107 ensembles by visual stimuli consisting of different orientations of drifting-gratings  
108 in layer 2/3 of primary visual cortex (Carrillo-Reid et al., 2015b; Miller et al.,  
109 2014). To identify neuronal ensembles we first turned the changes in  
110 fluorescence into a digital raster plot of activity. Mathematically, neuronal  
111 ensembles can be understood as multidimensional population vectors where  
112 each vector indicates the joint activation of a neuronal population at a different  
113 point in time (Fig. 2A). The dimensionality of the ensembles corresponds to the  
114 total number of imaged neurons. Because the same neuron can respond to  
115 multiple orientations, we searched for clusters in this multidimensional space to  
116 identify neuronal ensembles that responded to the same visual stimuli.  
117 Population vectors indeed formed clusters in a multidimensional space (Fig. 2B).  
118 We first visualized clusters defining neuronal ensembles using principal  
119 component analysis (PCA) as a commonly used multidimensional reduction  
120 technique (Carrillo-Reid et al., 2016). To compare these clusters quantitatively  
121 we quantified the normalized inner product between population vectors and used  
122 factorization of similarity matrices of the normalized inner product of all possible  
123 vector pairs. Since similarity matrices are symmetric, we then used singular value  
124 decomposition (SVD) to rigorously identify potential neuronal ensembles  
125 (Carrillo-Reid et al., 2015a; Carrillo-Reid et al., 2015b). After the identification of  
126 the ensembles we used a conditional random field (CRF) model (Fig. 2C) to find  
127 the neurons that are most representative for each ensemble, based on their  
128 predictability and the node strength of functional connections between neurons  
129 (Fig. 2D) (Carrillo-Reid et al., 2017). Such neurons could be optically targeted for  
130 two-photon optogenetic stimulation (Fig. 2E) using a spatial light modulator

131 (SLM) (Nikolenko et al., 2008). Indeed, neurons with high functional connectivity  
 132 have pattern completion capabilities (Carrillo-Reid et al., 2016), so the  
 133 identification of these pattern completion “critical” neurons can enable the  
 134 targeted optical manipulation of neuronal ensembles (Carrillo-Reid et al., 2017).  
 135

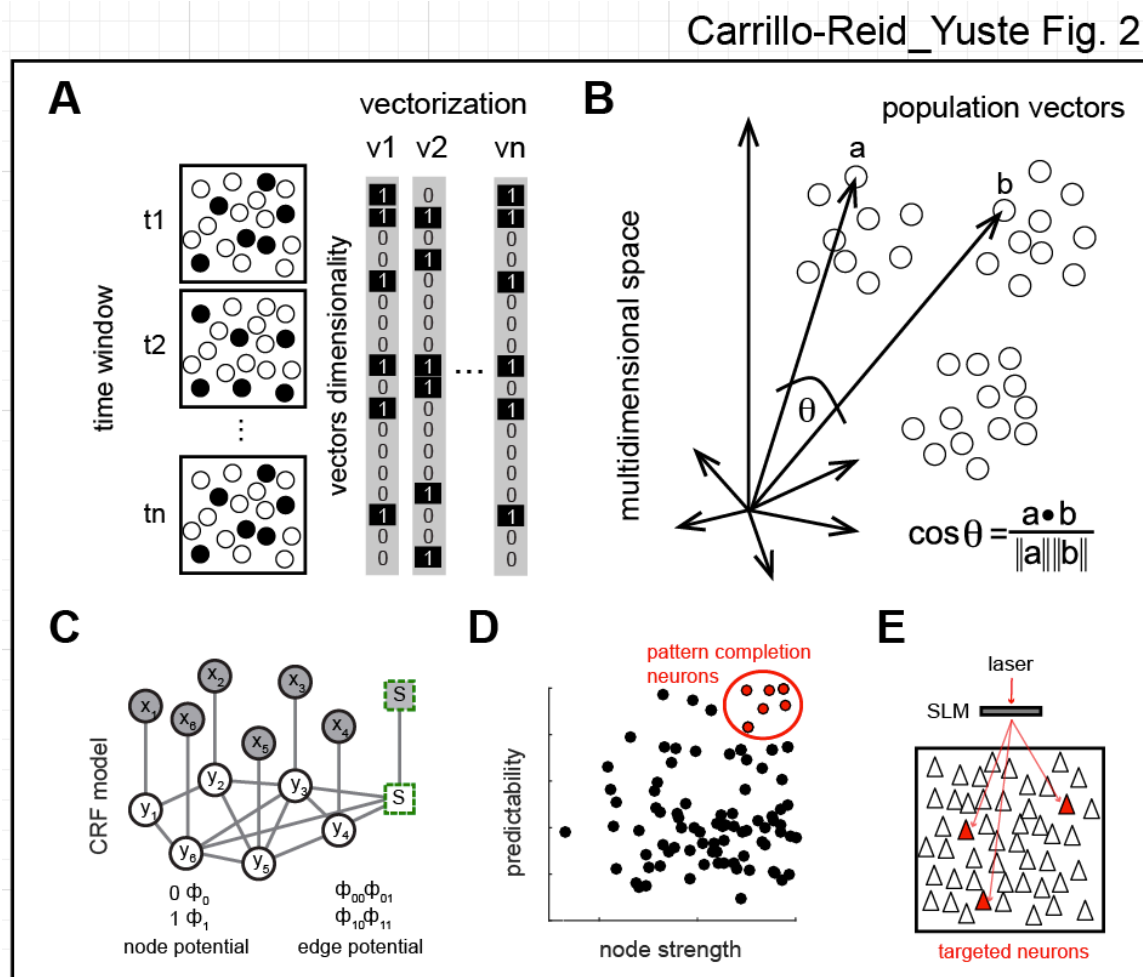

136

137 **Fig. 2. Identification of neuronal ensembles and neurons with pattern completion**  
 138 **capabilities**

139 (A) Schematic representation of neuronal activity at different time points and their representation  
 140 as population vectors (B) Cartoon of population vectors in a multidimensional space. Each dot  
 141 represents one population vector and clusters of population vectors define a neuronal ensemble.  
 142 The normalized inner product compares population vectors by the cosine of the angle between  
 143 any pair of vectors in a multidimensional space. (C) Graphical representation of Conditional  
 144 Random Field (CRF) models. Circles represent neurons. Visual stimulus is represented by an  
 145 added node (square). Shaded nodes (x) represent observed data. White nodes (y) represent  
 146 neurons from the graphical model. Edges indicate the mutual probabilistic dependencies between  
 147 neurons. Node potentials indicate if a neuron is active or inactive. Edge potentials represent  
 148 states of adjacent neurons. (D) Identification of most representative neurons from cortical  
 149 ensembles, related to a given visual stimuli, defined by predictability values computed as the  
 150 AUC from the ROC curve and node strengths (top right neurons). Red are the neurons with

151 pattern completion capability. (E) Neurons with pattern completion capability that co-express  
152 GCaMP6s and C1V1 can be simultaneously photostimulated using a SLM.  
153

### 154 **Reliably activation of Go-signal neuronal ensembles after training**

155 We then searched for Go and No-Go neuronal ensembles by performing PCA of  
156 population vector activity (Carrillo-Reid et al., 2016) in expert mice during  
157 behavior. Indeed, PCA showed the presence of a single Go-signal neuronal  
158 ensemble, which differed from separate clusters of population vectors  
159 representing different neuronal ensembles related to No-Go stimuli (Fig. 3A).  
160 SVD factorization (Carrillo-Reid et al., 2015b; Carrillo-Reid et al., 2016)  
161 confirmed the engagement of a neuronal ensemble that was reliably recalled  
162 during the Go signal, whereas No-Go visual stimuli recruited different set of  
163 population vectors visualized in the similarity map as different blocks of activity  
164 (Fig. 3B). The temporal course of ensemble activation computed by SVD  
165 factorization confirmed that neurons belonging to the Go-signal neuronal  
166 ensemble reliably responded to Go stimuli, whereas variable groups responded  
167 to No-Go signal (Fig. 3C) The spatial analysis of the activated neurons revealed  
168 that Go and No-Go neuronal ensembles constituted non-overlapping neuronal  
169 subgroups, and that population vectors evoked by No-Go visual stimuli fluctuate  
170 at different time points (Fig. 3D). To quantify the similarity between population  
171 vectors evoked by Go and No-Go signals we computed the normalized inner  
172 product between all the population vectors that belong to the Go ensemble and  
173 compared them against all the population vectors evoked by No-Go visual stimuli  
174 demonstrating that population vectors from the Go ensemble differed from No-Go  
175 signals (Fig. 3E; similarity index Go:  $0.38 \pm 0.0055$ ; similarity index Go vs No-Go:  
176  $0.046 \pm 0.0018$ ;  $P < 0.0001$ ). To quantify neuronal ensemble reliability we computed  
177 the percentage of times that a given visual stimuli activated a group of neurons  
178 above chance levels from the total number of Go or No-Go presentations. This  
179 demonstrated that, in expert mice, the Go ensemble was reliably activated when  
180 the Go signal was presented. On the contrary, No-Go visual stimuli poorly  
181 recalled its associated neuronal ensembles (Fig. 3F; reliability go:  $88 \pm 4$ ; reliability  
182 no-go:  $38 \pm 4$ ;  $P < 0.005^{**}$ ). In addition, a significantly lower amount of coactive

183 neurons were recalled by No-Go visual stimuli, as compared to the Go signal  
184 (Fig. 3G; coactive neurons Go:  $7.6 \pm 0.2$ ; coactive neurons No-Go:  $2.9 \pm 0.3$ ;  
185  $P < 0.0001^{****}$ ). This suggests that, in expert mice, Go ensembles become more  
186 reliable and the responsiveness of cortical microcircuits to No-Go visual stimuli is  
187 somewhat suppressed. However, the number of representative neurons defining  
188 Go and No-Go ensembles, albeit lower, was not significantly different (Fig. 3H;  
189 ensemble neurons Go:  $14.1 \pm 1.5$ ; ensemble neurons No-Go:  $12.3 \pm 1.1$ ;  $P > 0.05$   
190 n.s.), as previously shown for neuronal ensembles representing different  
191 orientations (Carrillo-Reid et al., 2015b; Carrillo-Reid et al., 2016; Miller et al.,  
192 2014). These experiments demonstrate that, in trained mice, Go neuronal  
193 ensembles are activated by visual stimulation more reliably than other neuronal  
194 ensembles.



Carrillo-Reid\_Yuste Fig. 3

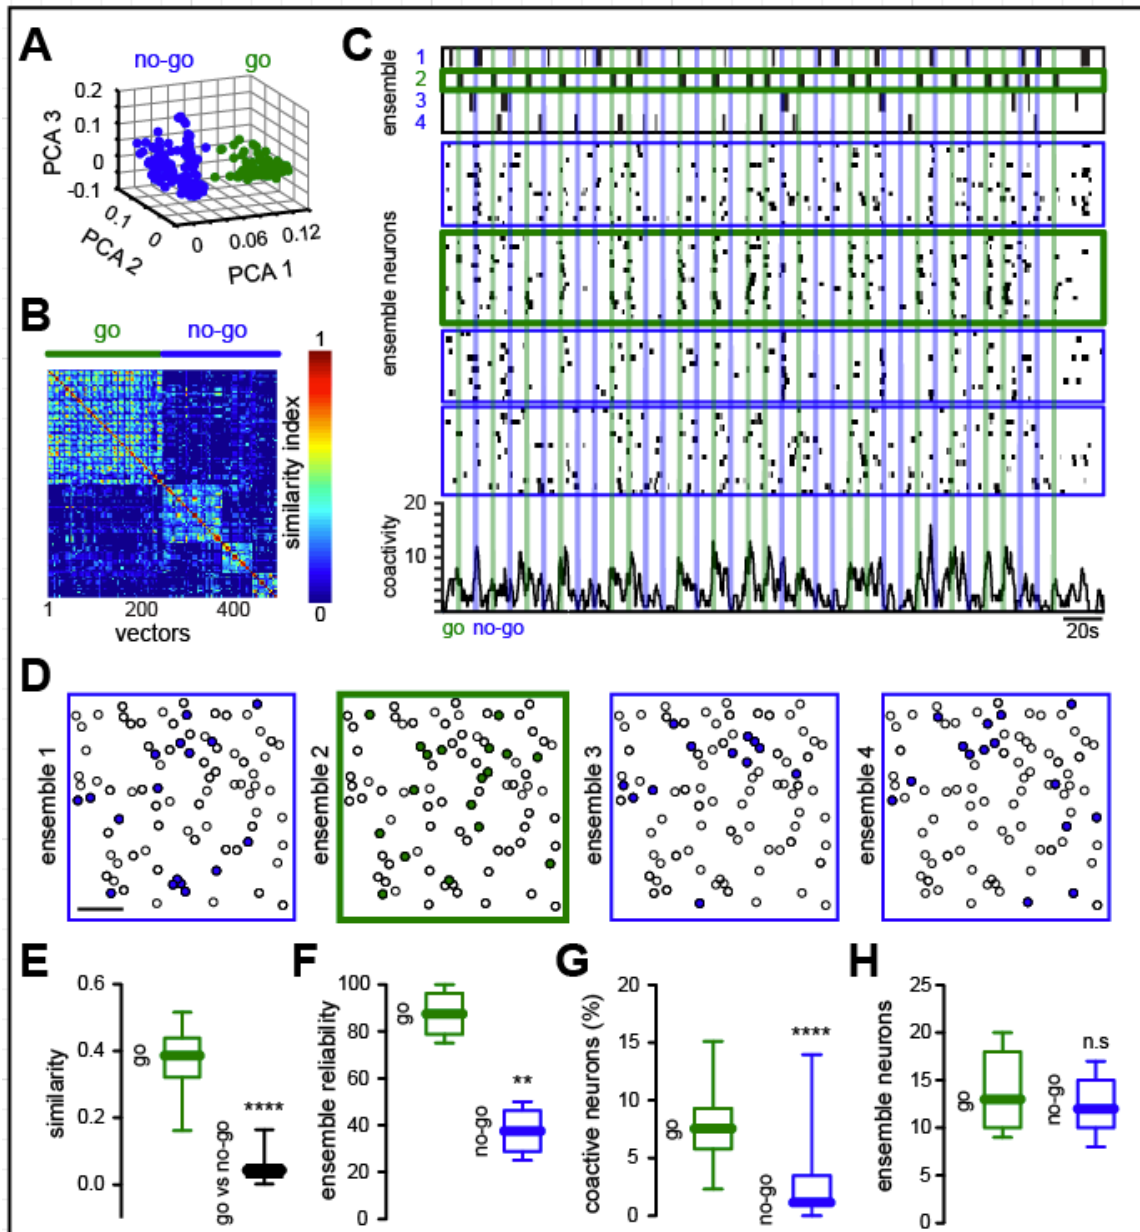

195

196 **Fig. 3. Reliable activation of neuronal ensemble by Go stimulus.**

197 (A) Different ensembles activated in Go and No-Go tasks in trained mice. PCA of population  
198 vectors evoked by visual stimuli show that coactive groups of neurons responding to the “Go”  
199 signal (green) define a cluster of vectors that differs from those activated by the “No-Go”  
200 signal (No-Go: blue). Each dot represents a population vector. (B) Sorted similarity map representing  
201 lack of overlap between population vectors from Go and No-Go ensembles. (C) Top: Time course  
202 of ensembles identified with SVD (Green: Go; Blue: No-Go). Middle: Raster plot of neurons  
203 belonging to these four neuronal ensembles (same order as in top). Note variability in individual  
204 responses. Bottom: Histogram of activity from all recorded neurons. Note that some No-Go trials  
205 have reduced network activity. (D) Spatial maps of same data showing that different subsets of  
206 neurons belong to the four cortical ensembles. Scale bar 50  $\mu$ m. (E) Cosine similarity between  
207 population vectors related to Go and No-Go stimulus ( $P < 0.0001$ ). (F) Reliability of Go ensembles  
208 is higher than that of No-Go ensembles ( $P < 0.005$ ). (G) Number of coactive neurons is reduced

209 during No-Go stimuli ( $P < 0.0001$ ). (H) Number of neurons from Go and No-Go ensembles is  
210 similar ( $P > 0.05$ ). Data presented as whisker box plots displaying median and interquartile ranges  
211 analyzed using Mann-Whitney test.  
212

### 213 **Two-photon imaging of holographic activation of targeted neurons**

214 After finding that a specific group of neurons are reliably recalled by behaviorally  
215 relevant Go visual stimuli we wondered if the activation of a handful of targeted  
216 neurons could alter behavioral performance. To test this, we used two-photon  
217 holographic patterns created by a spatial light modulator (SLM) to optogenetically  
218 target selective sets of neurons simultaneously (Packer et al., 2015; Rickgauer et  
219 al., 2014; Yang et al., 2018). To perform simultaneous two-photon imaging and  
220 two-photon optogenetics in targeted groups of neurons we used a holographic  
221 microscope with two independent two-photon lasers, one to image GCaMP6s  
222 (940 nm) and another to activate the red shifted opsin C1V1 (1040 nm) (Yang et  
223 al., 2018). Co-expression of GCaMP6s and C1V1 only occurred in ~50% of the  
224 neurons (Fig. 4A). To test if the joint photostimulation of several neurons was  
225 spatially restricted we targeted different combinations of pyramidal neurons in  
226 layer 2/3 of primary visual cortex and monitored the calcium transients of  
227 adjacent neurons (Figs. 4B and 4C). Targeted neurons co-expressing GCaMP6s  
228 and C1V1 showed clear changes in fluorescence evoked by photostimulation,  
229 compared to non-targeted neurons (Fig. 4D; fluorescence targeted:  $34 \pm 3\%$ ;  
230 fluorescence non-targeted:  $4 \pm 0.1\%$ ;  $P < 0.0001^{****}$ ) demonstrating that our  
231 approach can be used to selectively activate particular neuronal populations.

232

Carrillo-Reid\_Yuste Fig. 4

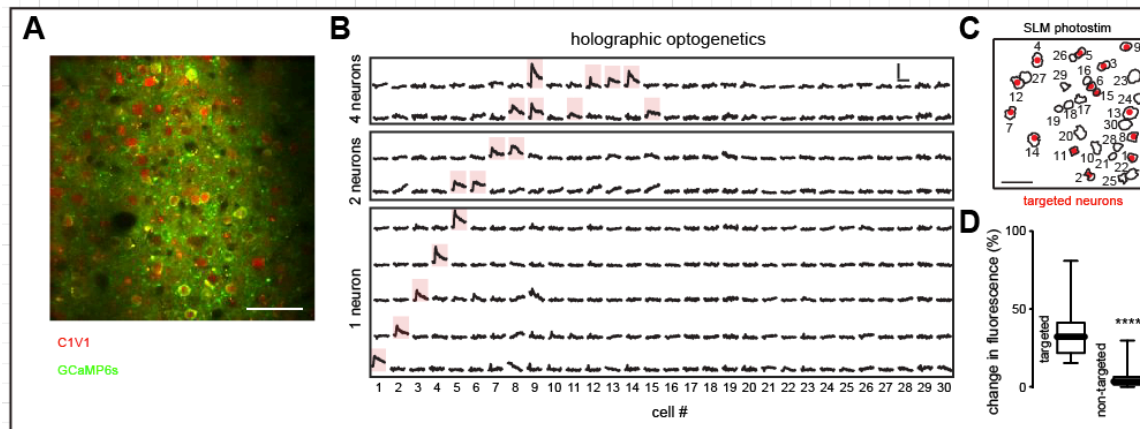

233

234 **Fig. 4. Simultaneous two-photon optogenetic photostimulation of cortical neurons**  
235 (A) Representative field of view depicting neurons co-expressing C1V1-mCherry (red) and  
236 GCaMP6s (green). Note that co-expression is sparse. (B) Calcium transients from neurons co-  
237 expressing C1V1 and GCaMP6s when different subsets of targeted cells were photostimulated.  
238 Red shadows show reliably responsive neurons when one or multiple cells were targeted using a  
239 Spatial Light Modulator (SLM). Scale bars: 10 sec and 50% change in fluorescence. (C) Spatial  
240 map of neurons co-expressing C1V1 and GCaMP6s. Targeted cells shown in A are highlighted in  
241 red. Scale bar 50  $\mu$ m. (D) Changes in fluorescence evoked in targeted neurons were significantly  
242 different than non-targeted neurons (n=30 neurons;  $P < 0.0001$ ; Mann Whitney test). Data  
243 presented as whisker box plots displaying median and interquartile ranges.

244

## 245 Holographic activation of non-GO neurons disrupts ensemble identity and 246 behavioral performance

247 To test the link between neuronal ensembles and behavior we proceeded in  
248 three steps. First, we activated, during the Go signal, a nonspecific group of  
249 neurons that did not belong to the Go ensemble (Fig. 5A; "Disrupt" condition =  
250 Go stimulus + SLM stimulation). This manipulation degraded the identity of the  
251 Go ensemble, creating a mixed response, visualized as population vectors that  
252 clearly differed from visually evoked neuronal ensembles (Fig. 5B). Accordingly,  
253 the similarity map of population vectors evoked by visual stimuli and population  
254 vectors evoked by the Disrupt condition revealed two different populations (Fig.  
255 5C). Population analysis demonstrated that population vectors evoked by Go-  
256 signal were significantly different from those population vectors during the Disrupt  
257 condition (Figs. 5D; similarity index go vs. disrupt:  $0.033 \pm 0.0036$ ; similarity index

258 Disrupt:  $0.43 \pm 0.0066$ ;  $P < 0.0001^{****}$ ), confirming that the Go ensemble were  
259 disrupted by the optogenetic stimulation by the targeted activation of a random  
260 group of neurons. SVD vector factorization showed different neuronal ensembles  
261 defining Go, No-Go and Disrupt ensembles. Specifically, the activity from Go and  
262 No-Go ensemble neurons was significantly reduced when the Disrupt neurons  
263 were activated together with visual stimuli (Fig. 5E). Disrupt ensembles (whose  
264 neurons were chosen randomly) were mostly composed by neurons not  
265 belonging to Go or No-Go ensembles (Fig 5F and 5G; not belonging neurons:  
266  $9.50 \pm 1.1$ ; Go neurons:  $2.5 \pm 0.4$ ; No-Go neurons:  $2.2 \pm 0.3$ ;  $P < 0.005^{**}$ ). The Disrupt  
267 protocol lead to a reduced reliability of Go ensemble activation (Fig. 5H; Go  
268 ensemble reliability in Disrupt conditions:  $4.3 \pm 1\%$ ;  $P < 0.005^{**}$ ) and reduced the  
269 cross-correlation between neurons belonging to Go ensembles (Fig. 5I; cross-  
270 correlation go:  $0.27 \pm 0.0149$ ; cross-correlation disrupt:  $0.02 \pm 0.0053$ ;  $P < 0.005^{**}$ ).  
271 Together with these changes in the Go ensemble, the Disrupt condition also led  
272 to significant decreases in task performance (Fig. 5J; performance Go:  $81.5 \pm 4\%$ ;  
273 performance Disrupt:  $66.8 \pm 6\%$ ;  $P < 0.05^*$ ) and increased onsets for licking (Fig.  
274 5K; lick onset go:  $1.2 \pm 0.1938$ s; lick onset disrupt:  $1.6 \pm 0.2558$ s;  $P < 0.05^*$ ). These  
275 experiments demonstrate that the targeted activation of a handful group of  
276 neurons can influence behavioral performance. We conclude that the Go  
277 ensemble is *necessary* for the correct execution of the visually guided task, since  
278 the disruption of the Go ensemble by the optogenetic activation of non-specific  
279 neurons was accompanied by a degradation of the behavior.

280

Carrillo-Reid\_Yuste Fig. 5

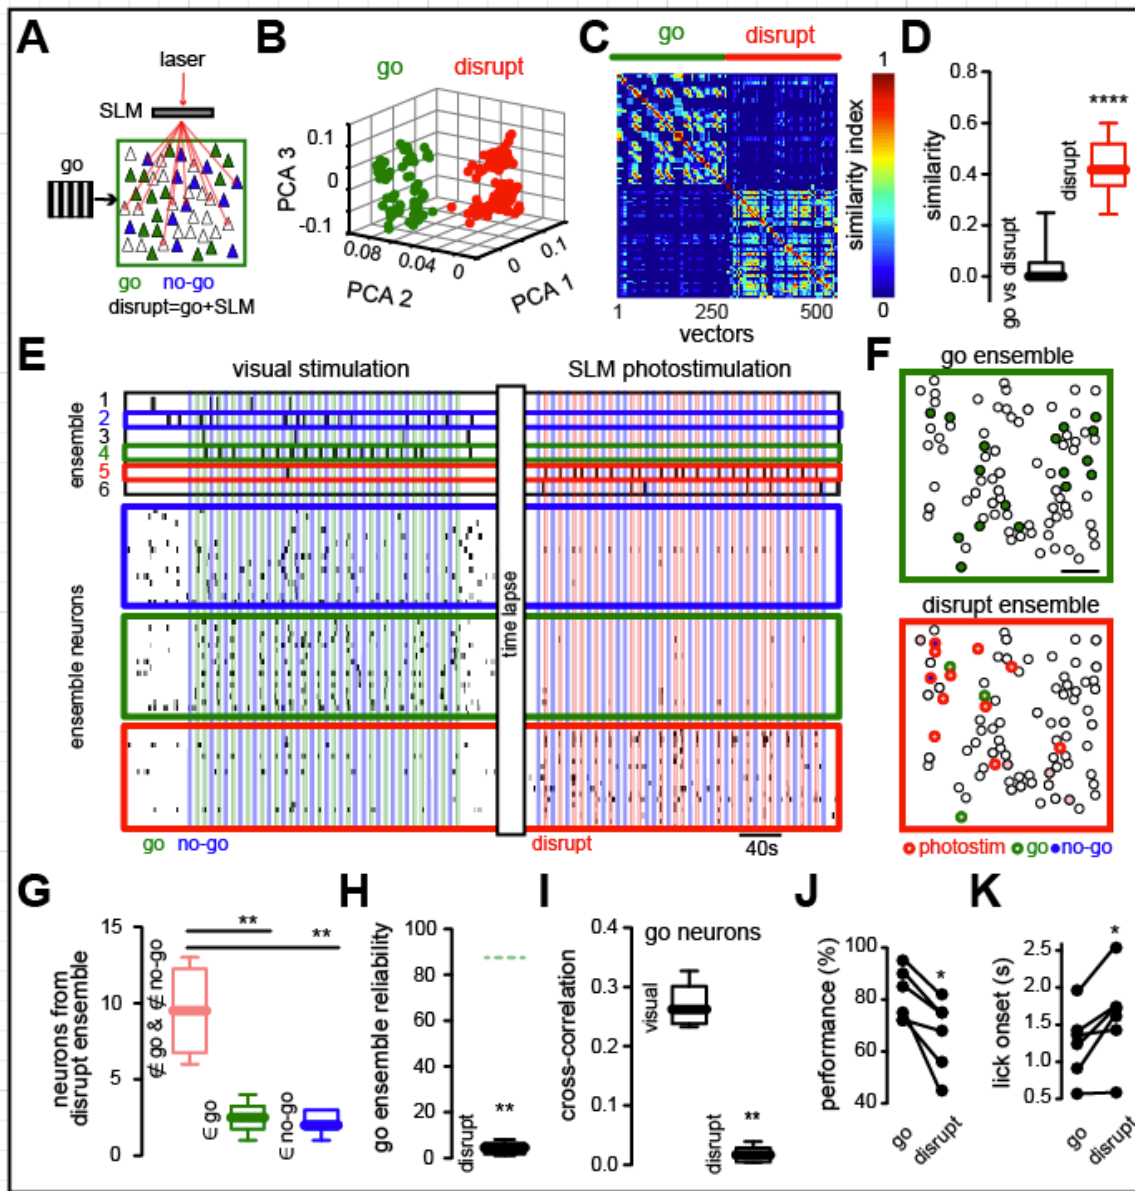

281

282 **Fig. 5. Unspecific neuronal activation degrades ensemble identity and visual performance.**  
 283 (A) Experimental protocol. Green neurons represent Go ensemble; blue represent No-Go  
 284 ensemble. During the Disrupt condition, unspecific sets of neurons (red; including neurons from  
 285 No-Go ensemble) are simultaneously photostimulated during Go stimulus presentation. (B)  
 286 Disruption of Go ensemble identity by stimulation of Disrupt neurons. PCA of population vectors  
 287 evoked by "Go" stimulus alone and with simultaneous photoactivation of disrupt neurons, which  
 288 generates a different cortical response (red). Each dot represents a population vector. (C)  
 289 Similarity maps of multidimensional population vectors showing that photostimulation of Disrupt  
 290 neurons during Go visual stimuli breaks down Go ensemble identity. (D) Go and Disrupt  
 291 ensembles are significantly different ( $P < 0.0001$ ). (E) Top: Neuronal ensemble analysis shows the  
 292 creation of an artificial neuronal ensemble (red) by targeted activation of Disrupt neurons. Bottom:  
 293 Raster plots of neurons belonging to Go, No-Go and Disrupt ensembles. Note reduction of  
 294 neuronal responses to the "Go" and "No-Go" neurons evoked by the simultaneous activation of  
 295 Disrupt neurons. (F) Spatial map of neurons from Go (green) and Disrupt ensembles (red).

296 Optogenetic targeting included neurons belonging to No-Go ensemble. Scale bar 50  $\mu\text{m}$ . (G)  
297 Disrupt ensemble is composed mainly of optogenetically targeted neurons ( $P < 0.005$ ). (H)  
298 Reliability of Go ensemble during disruption is significantly decreased during activation of disrupt  
299 neuron ( $P < 0.005$ ). Green dotted line represents Go ensemble reliability in control conditions. (I)  
300 Cross-correlation of Go ensemble neurons is significantly reduced by Disrupt protocol ( $P < 0.005$ ).  
301 (J) Behavioral performance is significantly decreased during Disrupt protocol ( $P < 0.05$ ). Data  
302 presented as whisker box plots displaying median and interquartile ranges analyzed using Mann-  
303 Whitney test. (K) Licking onset is significantly increased by Disrupt protocol ( $P < 0.05$ ).  $n = 6$  mice;  
304 Wilcoxon matched-pairs signed rank test.  
305

### 306 **Activation of Go ensembles by holographic optogenetics of pattern** 307 **completion neurons improves behavioral performance**

308 In a second step, we investigated whether the targeted recalling of the Go  
309 ensemble could improve behavioral performance, by holographic optogenetic  
310 activation of Go ensemble neurons during behavior (Fig. 6A). To do so, we first  
311 decreased the contrast of visual stimuli in trained mice in order to reduce task  
312 performance (Glickfeld et al., 2013), thereby increasing our sensitivity to detect  
313 behavioral changes in trained animals. Under low contrast visual stimulation  
314 conditions (10-40% contrast), the behavioral performance of trained animals  
315 significantly decreased (Fig. 1F). Given our past finding that stimulation of one or  
316 a few pattern completion neurons can recall an entire ensemble (Carrillo-Reid et  
317 al., 2016), we chose to selectively target several of them for photostimulation,  
318 using our CRF graph theory method to identify them first computationally from  
319 their responses to the Go stimulus (Fig. 2D; (Carrillo-Reid et al., 2017)). In order  
320 to perform these set of experiments, neurons with pattern completion capability  
321 must also co-express GCaMP6s and C1V1, so only a few of the animals used in  
322 the present study satisfied the criteria (6/122 mice) and very few pattern  
323 completion neurons were available for stimulation.

324 Holographic activation of two or more pattern completion neurons during low  
325 contrast visual stimuli generated evoked population vectors that overlapped with  
326 those originally evoked by Go-signals, confirming their pattern completion  
327 capabilities (Fig 6B). Similarity maps depicting the angles between population  
328 vectors belonging to the Go ensemble and Go ensembles activated by  
329 holographic photostimulation of pattern completion neurons in the presence of  
330 Go signals in low contrast indicated that both ensembles were indistinguishable

331 (Fig. 6C). Consistent with this, the similarity between population vectors was  
332 significantly increased by photostimulation (Fig. 6D; similarity index go (low):  
333  $0.26 \pm 0.0578$ ; similarity index go (recall):  $0.46 \pm 0.0074$ ;  $P < 0.005^{**}$ ), demonstrating  
334 that optogenetic targeting of several pattern completion neurons could be used  
335 reliably to activate (or “Recall”) a neuronal ensemble that represents a  
336 behaviorally relevant stimulus. The raster plot of neurons during the Recall  
337 condition showed that Go ensemble neurons were more reliably activated during  
338 optogenetic targeting of pattern completion neurons (Fig. 6E). Recall Go  
339 ensembles had a widespread spatial distribution and pattern completion neurons  
340 were not spatially clustered (Fig. 6F). As indicated by the similarity map (Fig. 6C)  
341 and raster plots (Fig. 6E), the reliability of Go ensembles in low contrast stimuli  
342 was significantly lower than that of Recall Go ensembles (Fig. 6G; left; reliability  
343 Go (low contrast):  $46.7 \pm 5\%$ ; reliability Go (Recall):  $91.5 \pm 2\%$ ;  $P < 0.005^{**}$ ). No-Go  
344 ensemble reliability remained unaltered by holographic stimulation of neurons  
345 with pattern completion capability (Fig. 6G; right; reliability No-Go (low contrast;  
346 no optogenetics):  $40 \pm 5\%$ ; reliability No-Go (low contrast with optogenetics):  
347  $23 \pm 4\%$ ;  $P > 0.05$  n.s). The increase in Go ensemble reliability during the Recall  
348 condition was reflected as enhanced cross-correlation of Go ensemble neurons  
349 (Fig 6H; cross-correlation go (low contrast):  $0.22 \pm 0.0089$ ; cross-correlation go  
350 (Recall):  $0.34 \pm 0.0155$ ;  $P < 0.005^{**}$ ). Consistent with this, the targeted optogenetic  
351 manipulation of pattern completion neurons significantly improved behavioral  
352 performance (Fig. 6I; performance Go (low):  $58.3 \pm 4\%$ ; performance go (Recall):  
353  $82.6 \pm 3.6\%$ ;  $P < 0.05^{*}$ ). Even though there was a shortening of the licking onset,  
354 this was not significant (Fig. 6J; lick onset Go (low):  $1.37 \pm 0.2623$ s; lick onset go  
355 (Recall):  $1.22 \pm 0.1949$ s;  $P > 0.05$  n.s). These results demonstrate a correlation  
356 between the increase in reliability of the Go ensemble by stimulation of pattern  
357 completion neurons and the enhancement of behavioral performance of a  
358 visually guided behavior.

Carrillo-Reid\_Yuste Fig. 6

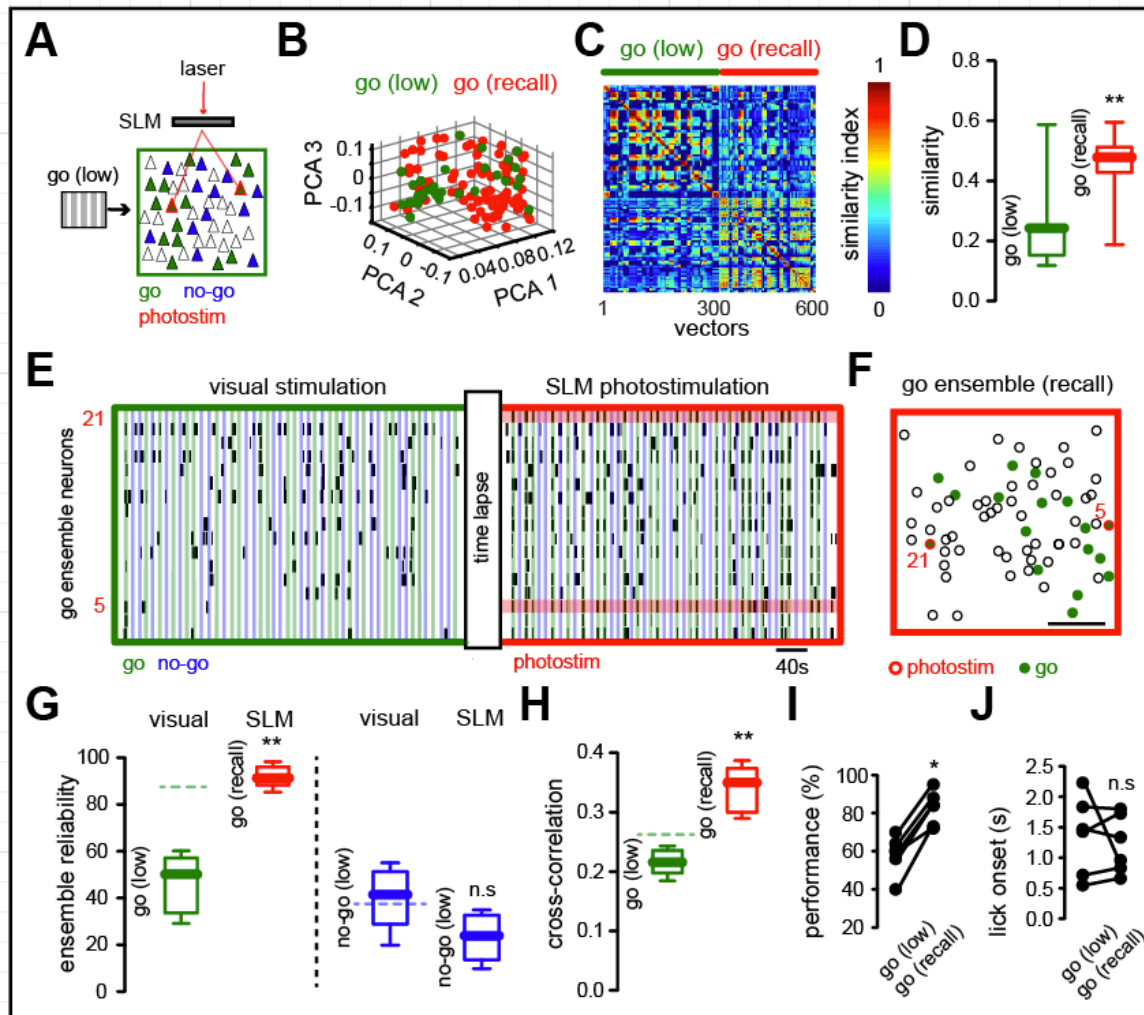

359

360 **Fig. 6. Activation of pattern completion neurons reliably improves Go ensemble and**  
 361 **enhances task performance.**

362 (A) Experimental protocol. Go stimulus neurons (green) in low contrast conditions and  
 363 simultaneously targeted pattern completion neurons (red) that belonged to the Go ensemble  
 364 (Recall condition). (B) PCA of population vectors evoked by the low contrast Go stimulus (green)  
 365 and simultaneous low contrast Go visual stimulation and activation of pattern completion neurons  
 366 (red). Each dot represents a population vector. (C) Similarity maps of population vectors  
 367 representing the Go ensemble in low contrast condition alone and with simultaneous holographic  
 368 photostimulation. (D) Recall condition increases Go ensemble reliability. (E) Raster plot from  
 369 neurons belonging to the Go ensemble shows change in overall activity evoked by the  
 370 simultaneous activation of two neurons with pattern completion capability (neurons 5 and 21; red  
 371 bars). Note that the reliability of individual neuronal responses is increased. (F) Spatial map of  
 372 layer 2/3 neurons highlighting neurons belonging to the Go ensemble (green). SLM  
 373 photostimulated neurons in red. Scale bar 50  $\mu$ m. (G) Reliability of Go and No-Go ensembles  
 374 during visual stimulation and SLM photostimulation of pattern completion neurons belonging to  
 375 the Go ensemble. Left: the reliability of recalled Go ensemble is significantly increased from Go  
 376 ensemble in low contrast conditions ( $P < 0.005$ ). Right: the reliability of No-Go ensemble  
 377 remains unaltered ( $P > 0.05$ ). Green and blue dotted lines represent the mean values from Go and  
 378 No-Go ensemble reliability in control conditions respectively. (H) The cross-correlation of neurons  
 379 belonging to the Go ensemble is significantly increased by SLM targeting of neurons with pattern



380 completion capability ( $P < 0.005$ ). Data presented as whisker box plots displaying median and  
381 interquartile ranges analyzed using Mann-Whitney test. (I) Behavioral response to low contrast  
382 Go-Signal is significantly enhanced by the targeted activation of pattern completion neurons  
383 ( $P < 0.05$ ). (J) The mean value of the licking onset was not significantly reduced under Recall  
384 conditions ( $P > 0.05$ ).  $n = 6$  mice; Wilcoxon matched-pairs signed rank test.

385

### 386 **Stimulation of at least two pattern completion neurons is necessary to** 387 **enhance behavioral response**

388 We wondered whether the behavioral performance could also be enhanced by  
389 the photoactivation of a single pattern completion neuron, since artificially  
390 imprinted ensembles, formed by the repetitive activation of a random group of  
391 neurons, can be recalled by single cell stimulation (Carrillo-Reid et al., 2016). To  
392 test this, we used two-photon optogenetics to activate one pattern completion  
393 neuron during low contrast visual stimuli (Fig. 7A), finding that this evoked  
394 population vectors that overlapped those evoked by activation of multiple pattern  
395 completion neurons (Fig. 7B). Moreover, photostimulation of individual pattern  
396 completion neurons also evoked population vectors that were similar to  
397 population vectors evoked by Go signals with low contrast (Fig. 7C; similarity  
398 single:  $0.34 \pm 0.0226$ ;  $P > 0.05$  n.s). However, the total number of recalled neurons  
399 was significantly enhanced by photostimulation of multiple neurons (Fig. 7D;  
400 recalled neurons from single neuron activation:  $4 \pm 0.52$ ; recalled neurons multiple  
401 neuron activation:  $6.68 \pm 0.44$ ;  $P < 0.005^{**}$ ). Indeed, the activation of several  
402 pattern completion neurons was more effective in recalling behaviorally relevant  
403 neuronal ensembles (Fig. 7E). Recalled ensembles after single neuron  
404 stimulation were also distributed across the field of view (Fig. 7F) and the cross-  
405 correlation of the recalled neurons was not significantly different from those of  
406 visual stimulation alone (Fig. 7G; cross-correlation single:  $0.24 \pm 0.0114$ ;  $P > 0.05$   
407 n.s). Ensemble reliability also remained the same between ensembles evoked by  
408 low contrast visual stimuli and single cell activation (Fig. 7H; reliability single:  
409  $50 \pm 5\%$ ;  $P > 0.05$  n.s). Consistent with this, the behavioral performance and the hit  
410 percentage were not enhanced by single neuron activation compared to low  
411 contrast visual stimuli, whereas activation of multiple pattern completion neurons  
412 still enhanced behavioral performance (Fig. 7I; performance Go (low contrast):

413 58.3±4%; performance single: 66.3±3.6%; performance SLM: 82.6±4%; P(low vs  
414 single)>0.05 n.s; P(single vs SLM)<0.005\*\*) by an increase in the number of hits  
415 (Fig. 7J; hits go (low): 76±3.4%; hits single: 77.7±3.4%; hits SLM: 89.5±3.3%;  
416 P(low vs single)>0.05 n.s; P(single vs SLM)<0.05\*). Thus, in these experiments,  
417 the targeted activation of a single pattern completion neuron was not able to  
418 reliably recall a Go-ensemble or enhance behavioral performance of a visually-  
419 guided task. We concluded that, under our experimental conditions, the  
420 holographic activation of at least two neurons with pattern completion capability  
421 is required to generate significant effects in behavioral performance.

Carrillo-Reid\_Yuste Fig. 7

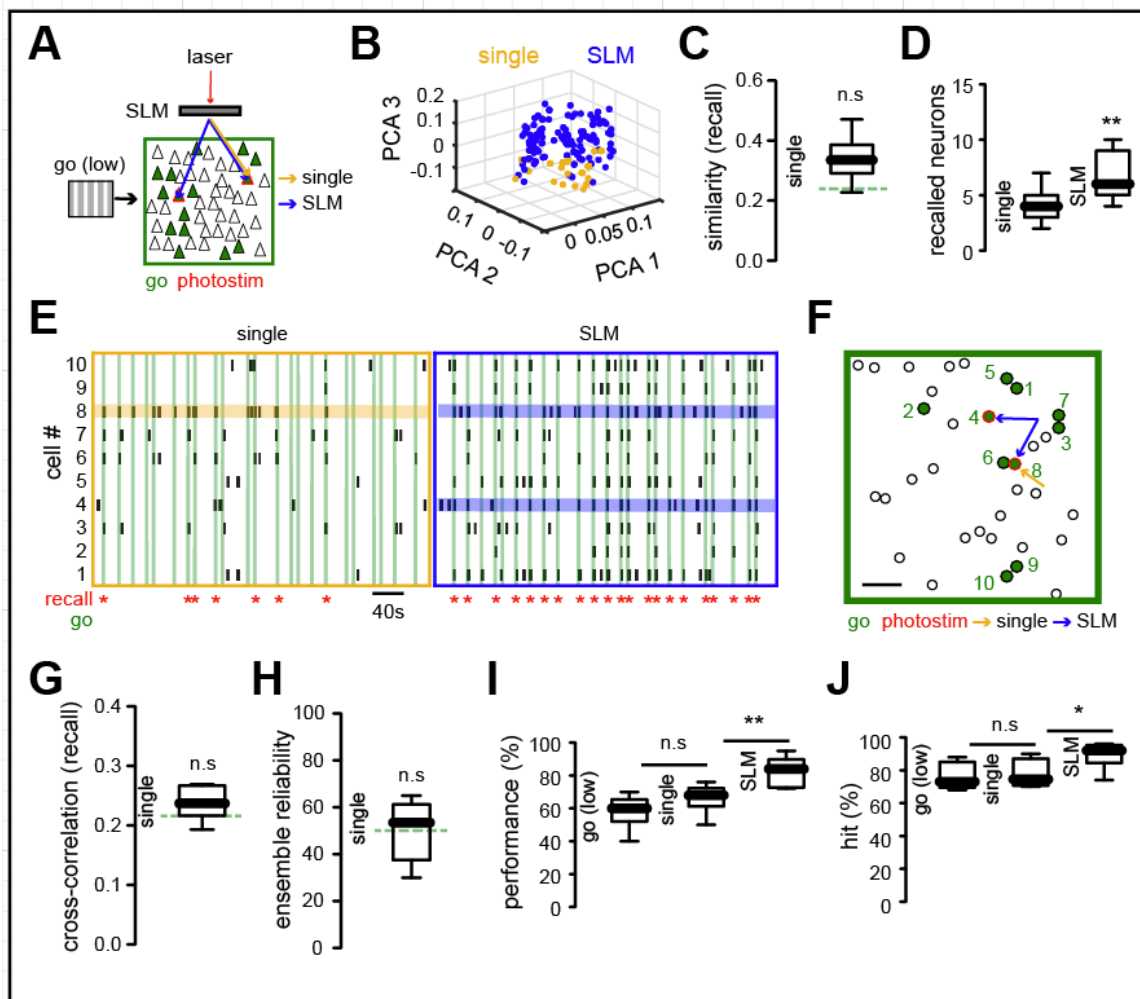

422  
423  
424  
425  
426  
427

**Fig. 7. Stimulation of more than one pattern completion neuron is necessary to improve behavioral performance.**

(A) Schematic representation of experimental conditions. Optogenetic stimulation of individual neurons with pattern completion capability was performed simultaneously with the presentation of low contrast Go stimuli. One (orange) or, for comparison, multiple neurons (blue) were stimulated.

428 (B) PCA of population vectors evoked by single (orange) or multiple pattern completion neurons  
429 (blue). Each dot represents a population vector. (C) Population vectors evoked by single cell  
430 photostimulation are not significantly different from population vectors evoked by Go stimuli  
431 (green). (D) Simultaneous photostimulation of multiple pattern completion neurons increased the  
432 number of recalled neurons ( $P < 0.005^{**}$ ). (E) Raster plot of the most representative neurons  
433 belonging to Go ensemble. Horizontal lines highlight photostimulated neurons (orange: single cell  
434 stimulation; blue: simultaneous photostimulation of multiple neurons). Recalled ensembles  
435 highlighted in red. Note that activation of multiple pattern completion neurons reliably recalls the  
436 Go ensemble. (F) Spatial map of photostimulated and recalled ensemble. Scale bar 50  $\mu\text{m}$ . (G)  
437 The cross-correlation of Go ensemble neurons (green) was not altered by stimulation of individual  
438 pattern completion neurons ( $P > 0.05$ ). (H) Go ensemble reliability (green) remained unaltered by  
439 stimulation of individual pattern completion neurons ( $P > 0.05$ ). Green lines represent mean values  
440 from Go ensembles (low). (I) Behavioral performance with single cell activation was not  
441 significantly different from low contrast visual stimuli alone ( $P > 0.05$ ) whereas activation of multiple  
442 neurons significantly increased behavioral performance ( $P < 0.005^{**}$ ). (J) Number of correct hits  
443 was not significantly different between single cell stimulation and visual stimuli alone ( $P > 0.05$ )  
444 whereas it was significantly increased by multiple neuron stimulation ( $P < 0.05^*$ ).  $n = 6$  mice. Data  
445 presented as whisker box plots displaying median and interquartile ranges using Mann-Whitney  
446 test.

447

448

449

#### 450 **Behavioral responses triggered by ensemble activation by pattern** 451 **completion neurons in the absence of visual stimulus**

452 To continue examining the behavioral role of ensembles, in a third step, we  
453 trigger the Go ensemble capability in the absence of any visual stimulation, by  
454 stimulating two pattern completion neurons from the Go ensemble together (Fig.  
455 8A). In some instances, the dual stimulation led to the recalling of the Go  
456 ensemble and this was accompanied by a major increase in behavioral  
457 performance, compared to the trials when the Go ensemble was not recalled  
458 (Fig. 8B; performance no recall:  $18.3 \pm 2.8\%$ ; performance recall:  $70.8 \pm 3.5\%$ ;  
459  $P < 0.005^{**}$ ). This suggests that optogenetic activation of multiple pattern  
460 completion neurons substituted for the Go stimulus. Consistent with this, the  
461 licking onset evoked by the recalling of the Go ensemble in the absence of visual  
462 stimuli was not significantly different from the licking onset evoked by Go visual  
463 stimuli under normal conditions (50% contrast) (Fig. 8C; licking onset visual:  
464  $1.2 \pm 0.1938\text{s}$ ; licking onset recall:  $1.6 \pm 0.1608\text{s}$ ;  $P > 0.05$  n.s). The cross-correlation  
465 of neurons belonging to the Go ensemble was also significantly higher during  
466 successful recalling epochs compared to non-recalling epochs (Fig. 8D; cross-  
467 correlation no recall:  $0.12 \pm 0.0064$ ; cross-correlation recall:  $0.26 \pm 0.0144$ ;

468  $P < 0.005^{**}$ ), indicating that Go ensemble neurons were activated together during  
469 the recalling epochs, as can be directly seen in the raster plot from neurons  
470 belonging to the Go ensemble (Fig. 8E). Recalled Go ensembles in the absence  
471 of visual stimuli also had a widespread spatial distribution (Fig. 8F) and the  
472 number of recalled neurons without visual stimuli in each trial was similar to the  
473 number of neurons recalled by visual stimuli (Fig. 8G; recalled neurons SLM:  
474  $6.5 \pm 1.1$ ;  $P > 0.05$  n.s). These experiments demonstrate that in trained mice,  
475 stimulation of pattern completion neurons successfully triggered the Go  
476 ensemble and the correct behavioral response.  
477

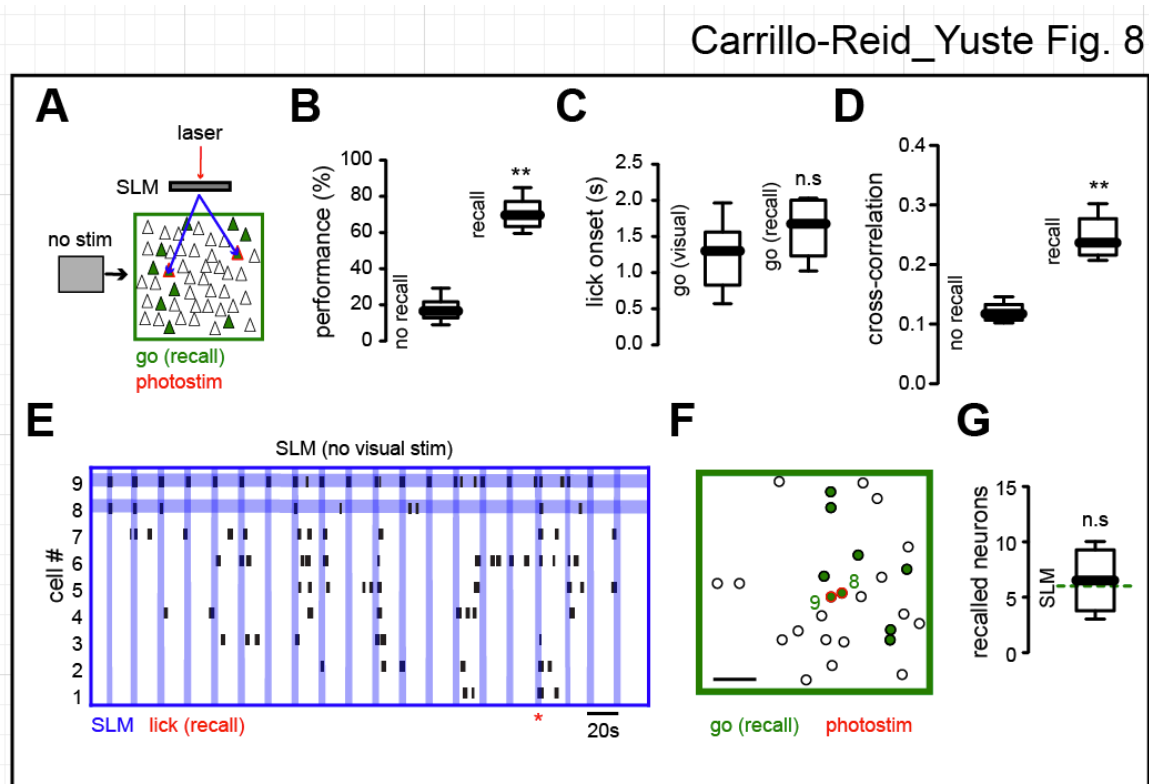

478 **Fig. 8. Behavior induced by recalling Go ensemble in absence of visual stimuli.**  
479 (A) Experimental conditions. Simultaneous optogenetic stimulation of pattern completion  
480 neurons was performed in the absence of visual stimuli (animals viewed a gray screen). (B) Behavioral  
481 performance evoked by recalling the Go ensemble by optogenetic stimulation in the absence of  
482 visual stimuli was significantly higher than performance in non-recall trials ( $P < 0.005^{**}$ ). (C)  
483 Licking onset from successfully driven optogenetic behavioral events was not significantly  
484 different from licking onset in visual evoked behavior ( $P > 0.05$ ).  $n = 6$  mice. (D) Paired cross-  
485 correlation of Go ensemble neurons was enhanced during successful recall, compared with non  
486 recall trials ( $P < 0.005^{**}$ ). (E) Raster plot of most representative neurons from Go ensemble during  
487 holographic stimulation of pattern completion neurons. Vertical blue lines indicate  
488 photostimulation. Horizontal lines highlight targeted neurons. Red marker shows successful  
489 recalling of Go ensemble and licking behavior. (F) Spatial map of E showing stimulated and  
490 recalled neurons during successful licking trial. (G) Number of recalled neurons after optogenetic  
491

492 stimulus was not significantly different from active neurons in low contrast conditions (line). Data  
493 presented as whisker box plots displaying median and interquartile ranges using Mann-Whitney  
494 test.

495

496

## 497 **Discussion**

498 Here we report that the precise holographic activation of targeted neurons can  
499 selectively and bidirectionally modify behavioral performance, and even  
500 substitute for the visual stimulus altogether, demonstrating that neuronal  
501 ensembles in layer 2/3 of mouse primary visual cortex constitute functional  
502 cortical units. Alterations in ensemble identity generated by targeted two-photon  
503 optogenetics disrupted behavioral performance in predictable ways: while  
504 activation of neurons not related to the perceptual task degraded behavioral  
505 performance, the precise activation of a behaviorally meaningful neuronal  
506 ensemble enhanced the behavior elicited by low contrast visual stimuli or could  
507 even trigger the behavior in the absence of visual stimulation. These experiments  
508 demonstrated that cortical ensembles are necessary and sufficient for visually-  
509 guided behavior.

510

## 511 **Pattern completion in neocortical circuits**

512 Pattern completion, defined as the ability to recall a complex pattern of  
513 information from a small part of it, is a cornerstone of human memory and many  
514 behaviors. In a neural circuit, pattern completion is thought to occur when an  
515 initial activity pattern is imprinted in a set of neurons via the strengthening of its  
516 connections (Seung and Yuste, 2010). After this stage, the activation of only one  
517 the neurons sets off the entire group. Initially proposed by Marr to explain  
518 associative recall in the hippocampus (Marr, 1971), the intrinsic ability of  
519 recurrently connected neural circuits to generate pattern completion has been  
520 highlighted by theorists, helping the system converge on attractors states  
521 (Hopfield, 1982; Hopfield and Tank, 1986). Completion of patterns of spikes was  
522 first described in hippocampus, using electrophysiological recordings (Mizumori  
523 et al., 1989), and it has been suggested that CA3, with its recurrent connectivity,  
524 may play a particularly important role in implementing it (Gold and Kesner, 2005).

525 More recently, hippocampal pattern completion has been linked to visual  
526 discrimination in the cortex (Hindy et al., 2016), indicating that pattern completion  
527 may not be specific to the hippocampus but found widely throughout the  
528 forebrain. In agreement with this, we previously found that coactivation of a group  
529 of neurons could imprint them to fire together as an ensemble, and that, for days  
530 after this, the stimulation of a single neuron could trigger the activation of the  
531 entire ensemble, a clear and direct demonstration of pattern completion by a  
532 neural circuit (Carrillo-Reid et al., 2016). This discovery implies that cortical  
533 circuits can function by the activation of modules, composed of groups of  
534 neurons, and that these modules are controlled by a few selected cells who can  
535 trigger them. Because of this useful property, and regardless of the mechanisms  
536 and its functional significance, in this study we use pattern completion as a tool to  
537 activate neuronal ensembles. As we demonstrate (Figures 6, 7 and 8), activation  
538 of pattern completion neurons is an effective method to externally manipulate the  
539 activity of neuronal populations, and, due to this property, we speculate that  
540 pattern completion will be a key mechanism internally used by neural circuits to  
541 activate neuronal ensembles.

542

### 543 **Comparison with previous findings**

544 Previous reports using electrical stimulation (Afriz et al., 2006; Bartlett and Doty,  
545 1980; Brecht et al., 2004; DeAngelis et al., 1998; Doty, 1965; Gu et al., 2012;  
546 Romo et al., 1998; Salzman et al., 1990) or one-photon optogenetic stimulation  
547 (Huber et al., 2008) of neurons in different cortical areas have reported  
548 behavioral correlates of neuronal activation. Our results, based on the precise  
549 manipulation and observation of functional ensembles, indicate that such  
550 observed effects, including the reports of individual neurons triggering motor  
551 responses (Brecht et al., 2004), could be due to the recalling of specialized  
552 neuronal ensembles by pattern completion neurons (Carrillo-Reid et al., 2016).  
553 Indeed, the recalling of neuronal ensembles related to the Go signal only  
554 produced a significant enhancement of behavioral performance when at least two  
555 neurons with pattern completion capability were simultaneously activated (Fig. 7).

556 Moreover, the fact that we can bidirectionally enhance or deteriorate behavioral  
557 performance as a function of the targeted neurons indicates that animal  
558 responses after electrical microstimulation (Bartlett and Doty, 1980; Salzman et  
559 al., 1990) may critically depend on the accurate recalling of functional cortical  
560 circuits.

561

### 562 **Behavioral relevance of ensembles**

563 One possible interpretation of our results would be that targeted optogenetics are  
564 just modulating the sensory stimulus at the cortical level. But perhaps the clearer  
565 demonstration of the functional importance of the ensemble is the fact that their  
566 activation triggered the behavioral responses in the absence of a visual stimulus  
567 (Fig. 8). This fascinating result suggests that the sensory stimulus can be  
568 substituted in trained animals by the activation of a neuronal ensemble, as  
569 opposed to the activation of individual neurons (Romo et al., 1998), perhaps  
570 thought a cascade of activation of downstream targets through pattern  
571 completion. Thus, the perception of a specific visual stimulus, as demonstrated  
572 by the correct behavior, can be internally driven and be independent of the  
573 sensory input. In this scenario, ensembles could be viewed as dynamical  
574 attractors that implement perceptual or memory states (Hopfield, 1982), rather  
575 than mere sensory states. Indeed, the ability to generate states of activity that  
576 are independent of the sensory realm, and which can be used to symbolize or  
577 mentally manipulate the world, has been long suspected to underlie the design  
578 logic of many areas of the central nervous system (Hebb, 1949; Hopfield, 1982;  
579 Lorente de No, 1938).

580

581 Finally, the demonstration that the precise manipulation of cortical ensemble  
582 identity can selectively alter behavioral performance opens the possibility to  
583 study the physiological role of targeted functional circuits with single cell  
584 resolution in awake behaving animals in other brain areas and learned tasks. The  
585 development of holographic microscopy (Yang et al., 2018) and animal models  
586 co-expressing opsins and genetically encoded calcium indicators, could help

587 discern the exact role of emergent states of activity, such as neuronal  
588 ensembles, as modular building blocks of neural circuits during functional or  
589 pathological behavioral states.

590

591

592

593 **Acknowledgments:** Laboratory members for help and virus injections. Stanford  
594 Neuroscience Gene Vector and Virus Core for AAVdj virus. We thank Clay  
595 Lacefield for advice in the behavioral setup. Supported by the National Eye  
596 Institute (DP1EY024503, R01EY011787), National Institute of Mental Health  
597 (R01MH101218; R01MH100561) and Defense Advanced Research Projects  
598 Agency (SIMPLEX N66001-15-C-4032). This material is based upon work  
599 supported by, or in part by, the U. S. Army Research Laboratory and the U. S.  
600 Army Research Office (Contract W911NF-12-1-0594, MURI). The authors  
601 declare no competing financial interests. L.C.-R. and R.Y. conceptualized this  
602 work. L.C.R., S.H., W.Y. and A.A. analyzed the data. L.C.-R., W.Y. and A.A.  
603 performed the experiments. L.C.-R. wrote the original draft. L.C.-R. and R.Y.  
604 reviewed and edited the paper. R.Y. assembled and directed the team and  
605 secured funding. All the data are archived at the NeuroTechnology Center at  
606 Columbia University.

607

## 608 **References**

609

610 Abeles, M. (1991). *Corticonics* (Cambridge, England: Cambridge University Press).  
611 Afraz, S.R., Kiani, R., and Esteky, H. (2006). Microstimulation of inferotemporal  
612 cortex influences face categorization. *Nature* 442, 692-695.  
613 Bartlett, J.R., and Doty, R.W. (1980). An exploration of the ability of macaques to  
614 detect microstimulation of striate cortex. *Acta Neurobiol Exp (Wars)* 40, 713-727.  
615 Brecht, M., Schneider, M., Sakmann, B., and Margrie, T.W. (2004). Whisker  
616 movements evoked by stimulation of single pyramidal cells in rat motor cortex.  
617 *Nature* 427, 704-710.  
618 Brown, S.L., Joseph, J., and Stopfer, M. (2005). Encoding a temporally structured  
619 stimulus with a temporally structured neural representation. *Nature neuroscience*  
620 8, 1568-1576.



- 621 Buzsaki, G. (2010). Neural syntax: cell assemblies, synapsembles, and readers.  
622 *Neuron* 68, 362-385.
- 623 Carrillo-Reid, L., Han, S., Taralova, E., Jebara, T., and Yuste, R. (2017). Identification  
624 and Targeting of Cortical Ensembles. *bioRxiv* 226514; doi:  
625 <https://doi.org/10.1101/226514>
- 626 Carrillo-Reid, L., Lopez-Huerta, V.G., Garcia-Munoz, M., Theiss, S., and Arbuthnott,  
627 G.W. (2015a). Cell Assembly Signatures Defined by Short-Term Synaptic Plasticity in  
628 Cortical Networks. *Int J Neural Syst* 25, 1550026.
- 629 Carrillo-Reid, L., Miller, J.E., Hamm, J.P., Jackson, J., and Yuste, R. (2015b).  
630 Endogenous Sequential Cortical Activity Evoked by Visual Stimuli. *J Neurosci* 35,  
631 8813-8828.
- 632 Carrillo-Reid, L., Tecuapetla, F., Tapia, D., Hernandez-Cruz, A., Galarraga, E., Drucker-  
633 Colin, R., and Bargas, J. (2008). Encoding network states by striatal cell assemblies. *J*  
634 *Neurophysiol* 99, 1435-1450.
- 635 Carrillo-Reid, L., Yang, W., Bando, Y., Peterka, D.S., and Yuste, R. (2016). Imprinting  
636 and recalling cortical ensembles. *Science* 353, 691-694.
- 637 Churchland, M.M., Cunningham, J.P., Kaufman, M.T., Foster, J.D., Nuyujukian, P., Ryu,  
638 S.I., and Shenoy, K.V. (2012). Neural population dynamics during reaching. *Nature*  
639 487, 51-56.
- 640 Cossart, R., Aronov, D., and Yuste, R. (2003a). Attractor dynamics of network UP  
641 states in neocortex. *Nature* 423, 283-289.
- 642 Cossart, R., Aronov, D., and Yuste, R. (2003b). Attractor dynamics of network UP  
643 states in the neocortex. *Nature* 423, 283-288.
- 644 DeAngelis, G.C., Cumming, B.G., and Newsome, W.T. (1998). Cortical area MT and the  
645 perception of stereoscopic depth. *Nature* 394, 677-680.
- 646 Denk, W., Strickler, J., and Webb, W. (1990). Two-photon laser scanning fluorescence  
647 microscopy. *Science* 248, 73-76.
- 648 Doty, R.W. (1965). Conditioned Reflexes Elicited by Electrical Stimulation of the  
649 Brain in Macaques. *J Neurophysiol* 28, 623-640.
- 650 Drew, P.J., Shih, A.Y., Driscoll, J.D., Knutsen, P.M., Blinder, P., Davalos, D., Akassoglou,  
651 K., Tsai, P.S., and Kleinfeld, D. (2010). Chronic optical access through a polished and  
652 reinforced thinned skull. *Nat Methods* 7, 981-984.
- 653 Glickfeld, L.L., Histed, M.H., and Maunsell, J.H. (2013). Mouse primary visual cortex is  
654 used to detect both orientation and contrast changes. *J Neurosci* 33, 19416-19422.
- 655 Gold, A.E., and Kesner, R.P. (2005). The role of the CA3 subregion of the dorsal  
656 hippocampus in spatial pattern completion in the rat. *Hippocampus* 15, 808-814.
- 657 Gu, Y., Deangelis, G.C., and Angelaki, D.E. (2012). Causal links between dorsal medial  
658 superior temporal area neurons and multisensory heading perception. *J Neurosci*  
659 32, 2299-2313.
- 660 Hebb, D.O. (1949). *The organization of behaviour* (The organization of behaviour:  
661 Wiley).
- 662 Hindy, N.C., Ng, F.Y., and Turk-Browne, N.B. (2016). Linking pattern completion in  
663 the hippocampus to predictive coding in visual cortex. *Nat Neurosci* 19, 665-667.
- 664 Hopfield, J.J. (1982). Neural networks and physical systems with emergent collective  
665 computational abilities. *Proc Natl Acad Sci USA* 79, 2554-2558.

- 666 Hopfield, J.J., and Tank, D.W. (1986). Computing with neural circuits: A model.  
667 *Science* 233, 625-633.
- 668 Huber, D., Petreanu, L., Ghitani, N., Ranade, S., Hromadka, T., Mainen, Z., and  
669 Svoboda, K. (2008). Sparse optical microstimulation in barrel cortex drives learned  
670 behaviour in freely moving mice. *Nature* 451, 61-64.
- 671 Lorente de No, R. (1938). Analysis of the activity of the chains of internuncial  
672 neurons. *J Neurophysiol* 1, 207-244.
- 673 MacLean, J.N., Watson, B.O., Aaron, G.B., and Yuste, R. (2005). Internal dynamics  
674 determine the cortical response to thalamic stimulation. *Neuron* 48, 811-823.
- 675 Marr, D. (1971). Simple memory: a theory for archicortex. *Philos Trans R Soc Lond B*  
676 *Biol Sci* 262, 23-81.
- 677 Miller, J.E., Ayzenshtat, I., Carrillo-Reid, L., and Yuste, R. (2014). Visual stimuli recruit  
678 intrinsically generated cortical ensembles. *Proceedings of the National Academy of*  
679 *Sciences of the United States of America* 111, E4053-4061.
- 680 Mizumori, S.J., McNaughton, B.L., Barnes, C.A., and Fox, K.B. (1989). Preserved  
681 spatial coding in hippocampal CA1 pyramidal cells during reversible suppression of  
682 CA3c output: evidence for pattern completion in hippocampus. *J Neurosci* 9, 3915-  
683 3928.
- 684 Mukamel, E.A., Nimmerjahn, A., and Schnitzer, M.J. (2009). Automated Analysis of  
685 Cellular Signals from Large-Scale Calcium Imaging Data. *Neuron* 63, 747-760.
- 686 Nikolenko, V., Watson, B.O., Araya, R., Woodruff, A., Peterka, D.S., and Yuste, R.  
687 (2008). SLM Microscopy: Scanless Two-Photon Imaging and Photostimulation with  
688 Spatial Light Modulators. *Front Neural Circuits* 2, 1-14.
- 689 Packer, A.M., Peterka, D.S., Hirtz, J.J., Prakash, R., Deisseroth, K., and Yuste, R. (2012).  
690 Two-photon optogenetics of dendritic spines and neural circuits. *Nature methods*.  
691 Packer, A.M., Russell, L.E., Dagleish, H.W., and Hausser, M. (2015). Simultaneous all-  
692 optical manipulation and recording of neural circuit activity with cellular resolution  
693 in vivo. *Nature methods* 12, 140-146.
- 694 Rickgauer, J.P., Deisseroth, K., and Tank, D.W. (2014). Simultaneous cellular-  
695 resolution optical perturbation and imaging of place cell firing fields. *Nature*  
696 *neuroscience* 17, 1816-1824.
- 697 Romo, R., Hernandez, A., Zainos, A., and Salinas, E. (1998). Somatosensory  
698 discrimination based on cortical microstimulation. *Nature* 392, 387-390.
- 699 Salzman, C.D., Britten, K.H., and Newsome, W.T. (1990). Cortical microstimulation  
700 influences perceptual judgements of motion direction. *Nature* 346, 174-177.
- 701 Sasaki, T., Matsuki, N., and Ikegaya, Y. (2007). Metastability of active CA3 networks.  
702 *The Journal of neuroscience : the official journal of the Society for Neuroscience* 27,  
703 517-528.
- 704 Schreiber, S., Fellous, J.M., Whitmer, D., Tiesinga, P., and Sejnowski, T.J. (2003). A  
705 new correlation-based measure of spike timing reliability. *Neurocomputing* 52-4,  
706 925-931.
- 707 Seung, H.S., and Yuste, R. (2010). Neural networks. In *Principles of Neural Science*,  
708 E.R. Kandel, and T.J. Jessel, eds. (New York: Mc Graw-Hill).
- 709 Shmiel, T., Drori, R., Shmiel, O., Ben-Shaul, Y., Nadasdy, Z., Shemesh, M., Teicher, M.,  
710 and Abeles, M. (2006). Temporally precise cortical firing patterns are associated  
711 with distinct action segments. *J Neurophysiol* 96, 2645-2652.

712 Stopfer, M., Jayaraman, V., and Laurent, G. (2003). Intensity versus identity coding in  
713 an olfactory system. *Neuron* 39, 991-1004.  
714 Villette, V., Malvache, A., Tressard, T., Dupuy, N., and Cossart, R. (2015). Internally  
715 Recurring Hippocampal Sequences as a Population Template of Spatiotemporal  
716 Information. *Neuron* 88, 357-366.  
717 Yang, W., Carrillo-Reid, L., Bando, Y., Peterka, D.S., and Yuste, R. (2018).  
718 Simultaneous two-photon imaging and two-photon optogenetics of cortical circuits  
719 in three dimensions. *Elife* 7.  
720 Yuste, R. (2015). From the neuron doctrine to neural networks. *Nat Rev Neurosci* 16,  
721 487-497.  
722 Yuste, R., and Denk, W. (1995). Dendritic spines as basic units of synaptic  
723 integration. *Nature* 375, 682-684.  
724 Yuste, R., and Katz, L.C. (1991). Control of postsynaptic Ca<sup>2+</sup> influx in developing  
725 neocortex by excitatory and inhibitory neurotransmitters. *Neuron* 6, 333-344.  
726

727 **Methods**

728 **Animals**

729 All experimental procedures were carried out in accordance with the US National  
730 Institutes of Health and Columbia University Institutional Animal Care and Use  
731 Committee. Experiments were performed on C57BL/6 male mice that were 60-90  
732 days of age before headplate implantation. Animals were housed on a 12h light-  
733 dark cycle with food and water *ad libitum*.

734 **Viral injections**

735 Virus AAV1-syn-GCaMP6s-WPRE-SV40 (400nl; 2E+13 vg/mL) and AVVdj-  
736 CaMKIIa-C1V1(E162T)-TS-P2A-mCherry-WPRE (200nl; titer 2.7e13 vg/mL)  
737 were injected simultaneously into layer 2/3 of left primary visual cortex (2.5 mm  
738 lateral and 0.3 mm anterior from the lambda, 200  $\mu$ m from pia) using borosilicate  
739 pulled pipettes (tip diameter 2 $\mu$ m). 40-60% of the cells co-expressed both  
740 viruses. Virus mixture was injected at a rate of 80 nl/min, after all the volume was  
741 injected the pipette was hold for 5 minutes in the injection site to avoid flow back  
742 of the viruses due to pipette removal.

743 **Headplate procedure**

744 3 weeks after virus injection mice were anesthetized with isoflurane (1-2%) and a  
745 custom designed titanium head plate was attached to the skull using dental  
746 cement in sterile conditions. Body temperature was maintained at 37 °C with an  
747 electric heater and monitored using a rectal probe. Dexamethasone sodium  
748 phosphate (2 mg/kg) and enrofloxacin (4.47 mg/kg) were administered  
749 subcutaneously. Carprofen (5 mg/kg) was administered intraperitoneally. A  
750 reinforced thinned skull window for chronic imaging (2 mm in diameter) was  
751 made above the injection site using a dental drill. A 3-mm circular glass coverslip  
752 was placed and sealed using a cyanoacrylate adhesive (Drew et al., 2010).  
753 During the surgery eyes were moisturized with eye ointment. After surgery  
754 animals received carprofen injections for 2 days as post-operative pain  
755 medication. Mice were allowed to recover for 5 days with food and water *ad*  
756 *libitum*.

757 **Behavioral system**

758 We used a custom made treadmill attached to an angular position magnetic  
759 sensor. The water is delivered using a solenoid valve attached to a gravity water  
760 system. The waterspout was located at 1.5 mm from the animal's mouth. The  
761 volume delivered for each correct trial was 4 $\mu$ l determined by the opening  
762 duration of the solenoid valve. Licking was monitoring with a commercial  
763 capacitive touch sensor attached to the waterspout. All signals were recorded to  
764 a host computer using a Digital Acquisition Board using MATLAB. An Arduino  
765 Uno connected via an USB interface to the host computer controlled visual  
766 stimulation and water delivery.

### 767 **Visual stimulation**

768 Visual stimuli were generated using MATLAB Psychophysics Toolbox and  
769 displayed on a LCD monitor positioned 15 cm from the right eye at 45° to the  
770 long axis of the animal. Visual stimuli consisted of full-field sine wave drifting-  
771 gratings (contrasts: 100%, 50% and <40%, 0.035 cycles/°, 2 cycles/sec) drifting  
772 in two orthogonal directions presented for 2 sec, followed by 6 sec of mean  
773 luminescence. Experiments in the absence of visual stimuli (Fig. 8) were  
774 recorded with the monitor displaying a gray screen with mean luminescence  
775 similar to drifting-gratings.

### 776 **Behavioral training**

777 After recovery from headplate implantation mice were weighted and handled for  
778 2 days under water restriction until they reach 85% of their original weight, during  
779 this time mice underwent an habituation training to lick the waterspout and  
780 maneuver on the treadmill for 15-30 minutes daily. One hour before behavioral  
781 training food was removed. After the habituation period mice underwent a  
782 training phase for 3 days consisting in one session of 200 trials where water  
783 reward was automatically delivered following the Go signal (contrast 100%).  
784 Licking during the No-Go signal was punished with high frequency noise  
785 (200Hz). Following the training phase mice licked preferentially in water reward  
786 periods and avoided licking in No-Go periods. After the training phase the task  
787 phase began (day 1) where Go and No-Go visual stimuli (contrast 50%) were  
788 presented randomly in two sessions of 150 trials each separated by 10 min. Each

789 stimulus was presented 50% of the time avoiding the presentation of the same  
790 stimulus more than two times in a row. After 7 days of the task phase mice  
791 reached a performance level above 75% that plateau for at least 8 days (Fig.  
792 1C). Daily water supplementation was done to keep weight at 85% of the original  
793 value before animals were kept in their home cages overnight where food was  
794 available *ad libitum*.

795 Performance was calculated during the task phase as  $P = \text{hits}/(\text{hits} + \text{miss}) - \text{false}$   
796  $\text{choices}/(\text{false choices} + \text{correct rejects})$ .

### 797 **Simultaneous two-photon calcium imaging and photostimulation**

798 Imaging experiments were performed 7-28 days after head plate fixation. During  
799 recording sessions mouse is awake (head fixed) and can move freely on a  
800 treadmill. The imaging setup and the objective were completely enclosed with  
801 blackout fabric and a black electrical tape to avoid light contamination leaking  
802 into the PMTs. We used calcium imaging to monitor the activity of neuronal  
803 populations (Yuste and Katz, 1991). Two-photon imaging and optogenetic  
804 photostimulation were performed with two different femtosecond-pulsed lasers  
805 attached to a commercial microscope. An imaging laser (Ti:sapphire;  $\lambda = 940$  nm)  
806 was used to excite a genetically encoded calcium indicator (GCaMP6s) while a  
807 photostimulation laser (low repetition rate pulse-amplified laser;  $\lambda = 1040$  nm)  
808 was used to excite a red shifted opsin (C1V1) that preferentially responds to  
809 longer wavelengths (Packer et al., 2012). The power of both lasers was  
810 controlled by two independent pockels cells.

811 The two laser beams on the sample are individually controlled by two  
812 independent sets of galvanometric scanning mirrors. The imaged field of view  
813 was  $\sim 240 \times 240 \mu\text{m}$  (25X NA 1.05 XLPlan N objective), comprising 50-120  
814 neurons. Neuronal contours were automatically identified using independent  
815 component analysis and image segmentation (Mukamel et al., 2009). Short  
816 movies ( $\sim 720$  s) with a sample rate of 200-250 ms/frame were collected at time  
817 intervals of 5-10 min for up to 2h (Imaging laser power  $< 50$  mW; dwell time 2  
818  $\mu\text{s}/\text{pixel}$ ;  $256 \times 256$  pixels in the whole field of view).

819 Population photostimulation was performed splitting the laser beam into multiple  
820 foci using holographic stimulation through a Spatial Light Modulator (SLM). We  
821 adjusted the power of photostimulation in each neuron (Photostimulation laser  
822 power ~5 mW) such that the amplitude of calcium transients evoked by C1V1  
823 activation was not significantly different to the amplitude of calcium transients  
824 evoked by visual stimulation with drifting-gratings as previously shown (Carrillo-  
825 Reid et al., 2016). Single cell photostimulation was performed with a spiral  
826 pattern scanned by a pair of post-SLM galvanometric mirrors delivered from the  
827 center of the cell to the boundaries of the soma at 0.001 pix/ $\mu$ s (12 $\mu$ m diameter;  
828 20 Hz) for one second. Photostimulation began 50ms after the onset of visual  
829 stimuli. The pulse repetition rate for photostimulation laser was 1MHz.

830 Simultaneous imaging and photostimulation was controlled by Prairie View and  
831 custom made software running in MATLAB.

832 For imaging experiments during behavioral task we performed 250 trials divided  
833 in 10 sessions (25 trials each) separated by 5 minutes. The first 3 sessions and  
834 the last 3 sessions were discarded from the analysis to avoid underestimation of  
835 behavioral performance due to motivation factors.

### 836 **Image processing**

837 Image processing was performed with Image J (v.1.42q, National Institutes of  
838 Health) and custom made programs written in MATLAB as previously described  
839 (Carrillo-Reid et al., 2008; Carrillo-Reid et al., 2016; Cossart et al., 2003b).  
840 Acquired images were processed to correct motion artifacts using TurboReg.  
841 Regions of interest (ROIs) representing neurons were automatically identified  
842 using principal component analysis (PCA) and independent component analysis  
843 (ICA) algorithms written in Matlab (Mukamel et al., 2009). Calcium transients  
844 were computed as changes in fluorescence:  $(F_i - F_o)/F_o$ , where  $F_i$  denotes the  
845 fluorescence intensity at any frame and  $F_o$  denotes the basal fluorescence of  
846 each neuron (Miller et al., 2014). Spikes were inferred from the gradient (first  
847 time derivative) of calcium signals using a threshold of 3 standard deviations  
848 (S.D) above noise. We constructed an  $N \times F$  binary matrix, where  $N$  denotes the  
849 number of active neurons and  $F$  represents the total number of frames for each

850 movie. Each row in the binary matrix represents the activity of one neuron. To  
851 visualize neuronal activity the binary matrix was plotted as a raster plot where  
852 ones are represented by dots.

### 853 **Identification of neuronal ensembles**

854 To identify neuronal ensembles from population calcium imaging recordings we  
855 constructed multidimensional population vectors that contain the information of  
856 the simultaneous activity of recorded neurons. The method is based on vectorial  
857 analysis (Carrillo-Reid et al., 2017; Carrillo-Reid et al., 2015a). Only population  
858 vectors with more active neurons in a given time than the ones expected by  
859 chance ( $P < 0.01$ ) were considered for analysis. We tested the significance of  
860 population vectors against the null hypothesis that the synchronous firing of  
861 neuronal pools is given by a random process (Shmiel et al., 2006). Such  
862 population vectors can be used to compare the network activity as a function of  
863 time in different experimental conditions (Brown et al., 2005; Carrillo-Reid et al.,  
864 2008; Sasaki et al., 2007; Schreiber et al., 2003; Stopfer et al., 2003). The  
865 number of dimensions for each experiment is given by the total number of  
866 recorded cells. The temporal vectorization of the network activity allows the  
867 discrimination of specific coactive groups that are repeated at different times  
868 (Brown et al., 2005; Carrillo-Reid et al., 2008; Schreiber et al., 2003). To  
869 measure the similarity between population vectors at different experimental  
870 conditions we computed the normalized inner product (Carrillo-Reid et al., 2008;  
871 Sasaki et al., 2007; Schreiber et al., 2003), which represents the cosine of the  
872 angle between two vectors. To identify neuronal ensembles we constructed  
873 similarity maps from all the possible combinations of similarity values between  
874 vector pairs. In this way the time course of each neuronal ensemble is defined by  
875 each factor of the singular value decomposition (SVD) of the binary similarity  
876 map. The factorization is defined by a symmetric matrix  $M=V\Sigma V^T$ , where  $V$  and  
877  $V^T$  are orthonormal and the elements of  $\Sigma$  denote the singular values. The factors  
878 from the SVD associated with a singular value whose magnitude was above  
879 chance level represent the population vectors when a recurrent ensemble was  
880 active as previously published (Carrillo-Reid et al., 2017; Carrillo-Reid et al.,



881 2015a; Carrillo-Reid et al., 2015b; Carrillo-Reid et al., 2016). To determine if the  
882 representative population vectors that define cortical ensembles could appear by  
883 chance we shuffled the overall activity matrix preserving the dimensionality of  
884 population vectors and compared the probability distribution of similarity  
885 coefficients from real data and shuffled data.

### 886 **Identification of neurons with pattern completion capability**

887 To identify the neurons to be targeted by two-photon optogenetics we used  
888 conditional random fields (CRFs) to model the conditional probability distribution  
889 to see a given neuronal ensemble firing together (Carrillo-Reid et al., 2017). We  
890 used CRFs to capture the contribution of specific neurons to the overall network  
891 activity defined by population vectors belonging to a given neuronal ensemble.  
892 We generated a graphical model where each node represents a neuron in a  
893 given ensemble and edges represent the dependencies between neurons. 90%  
894 of the recorded data were used for training and the remaining 10% were used for  
895 cross-validation. The model parameters were determined by the local maximum  
896 of the likelihood function in the parameter space. Based on the model the node  
897 strength between adjacent nodes is defined by the summation of the edge  
898 potentials representing concomitant activity between neurons. The defined node  
899 strength reflects the conditional probability of co-activation between neurons. To  
900 measure which neurons are the most important for a given ensemble we  
901 computed the standard receiver operating characteristic curve (ROC), taking as  
902 ground truth the timing of a particular visual stimuli. The computation of the area  
903 under the curve (AUC) from the ROC curve that represents the performance of  
904 each neuron and the node strength that represents the connectivity between  
905 adjacent nodes were used to capture in a two dimensional space the most  
906 important neurons from each ensemble. As it has been shown recently, high  
907 ranked neurons observed in this two dimensional space have the potential to  
908 recall a given ensemble. CRF models were trained using the Columbia University  
909 Yeti Shared HPC cluster. The code used for CRF models can be found at  
910 [https://github.com/hanshuting/graph\\_ensemble](https://github.com/hanshuting/graph_ensemble).

911
